# Supplementary material for: Social encounter profiles of greater Melbourne residents, by location – a telephone survey
Source: BMC Infect Dis. 2015 Nov 2;15:494. doi: 10.1186/s12879-015-1237-9 (PMC4631075; doi:10.1186/s12879-015-1237-9)
Supplement: Additional file 3: — Contact Diary. Additional file descriptions text (including details of how to view the file, if it is in a non-standard format). (PDF 61 kb) [file 12879_2015_1237_MOESM3_ESM.pdf]

## SAMPLE DIARY CARD MONDAY

**SUBJECT ID**

[illegible]
